# Supplementary material
Source: ML conference proceedings conference paper supplement (https://openreview.net/forum?id=tsE5HLYtYg)
Supplement: supplementary_material [file attachment]

## **Supplementary-Material**

### **Paper: Safe Reinforcement Learning with World Models**

Our training codes and demos are all available on the anonymous

website: <https://sites.google.com/view/safedreamer>
